# Supplementary material for: 3D particle averaging and detection of macromolecular symmetry in localization microscopy
Source: PubMed Central journal article supplement (PMC8121824; doi:10.1038/s41467-021-22006-5), 2021-05-14
Supplement: 41467_2021_22006_MOESM2_ESM.pdf [file 41467_2021_22006_MOESM2_ESM.pdf]

**Title:** Supplementary Movie 1

**Description:** 3D visualization of the superparticle as a result of fusing 306 experimental Nup107 PAINT particles.

**Title:** Supplementary Movie 2

**Description:** 3D visualization of the superparticle as a result of fusing 356 experimental Nup107 STORM particles.

**Title:** Supplementary Movie 3

**Description:** 3D visualization of the superparticle as a result of fusing 300 experimental Nup96 STORM particles together with its detected symmetry axis.

**Title:** Supplementary Movie 4

**Description:** 3D visualization of the superparticle as a result of fusing 400 experimental Tetrahedron DNA-origami nanostructures imaged using PAINT together with its detected symmetry axes. The white bars show the 3-fold symmetry axes of the tetrahedron.

**Title:** Supplementary Movie 5

**Description:** The effect of symmetry promotion on the superparticle of Nup107 PAINT data after Lie-algebra averaging step.
